# Supplementary material for: Cell-cycle-dependent Ca2+ transients in human induced pluripotent stem cells revealed by a simultaneous imaging of cell nuclei and intracellular Ca2+ level
Source: Royal Society of Chemistry journal article supplement (doi:10.1039/c6ib00074f), 2016-01-01
Supplement: c6ib00074f1.pdf [file c6ib00074f1.pdf]

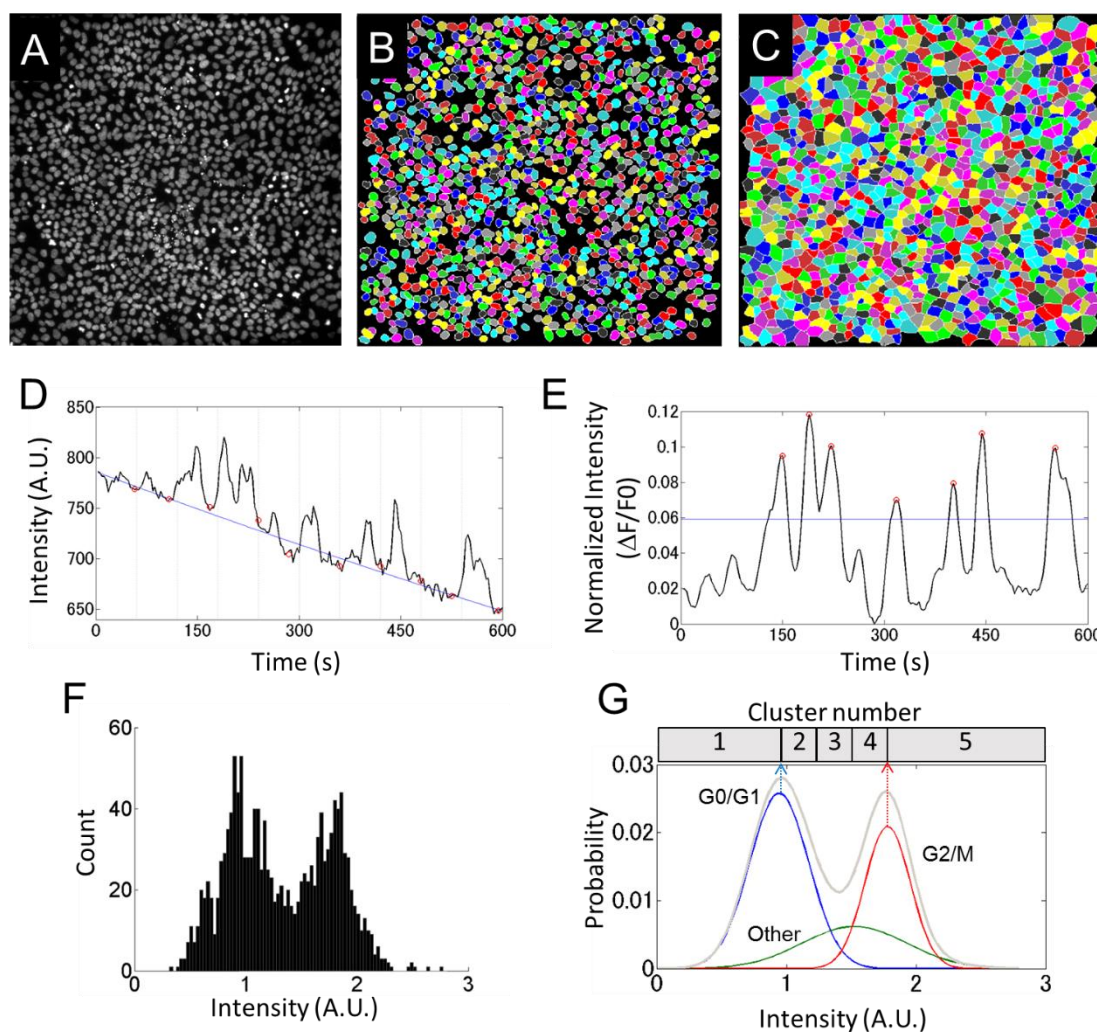

**Supplementary figure S1.** Procedure of image analysis. Cell nuclei (B) were recognized from nuclei images (A), and then cell areas (C) were segregated by expanding the nuclei areas. Ca<sup>2+</sup> intensity (D) was normalized by fitting a second-order polynomial (blue line). Ca<sup>2+</sup> transients beyond a threshold (blue line) were detected from the normalized Ca<sup>2+</sup> trace (E). Three Gaussian distributions were fitted to histogram of integrated intensity of DNA-binding dye (F). Cells were partitioned into five clusters based on the G0/G1 and G2/M peaks (G).

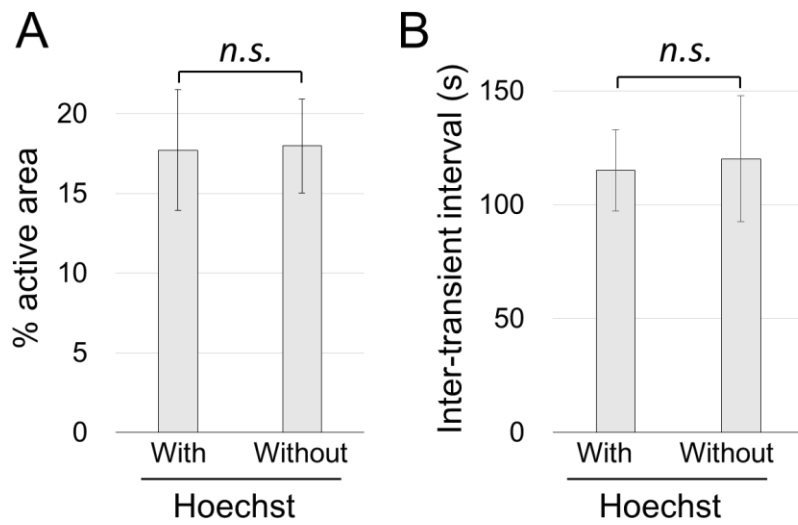

**Supplementary figure S2.** Effects of Hoechst incorporation into DNA. Images were separated into 2500 patches and Ca<sup>2+</sup> transients were detected from each patch. (A) Ratios of cells exhibiting Ca<sup>2+</sup> transients. (B) Inter-transients intervals of Ca<sup>2+</sup> transients. There are no significant differences with and without Hoechst incorporation, indicating that Hoechst did not change the properties of the Ca<sup>2+</sup> transients. Error bars represent SD;  $n = 22$  for with Hoechst,  $n = 5$  for without Hoechst; *n.s.*:  $p > 0.1$ ; Welch's  $t$  test.

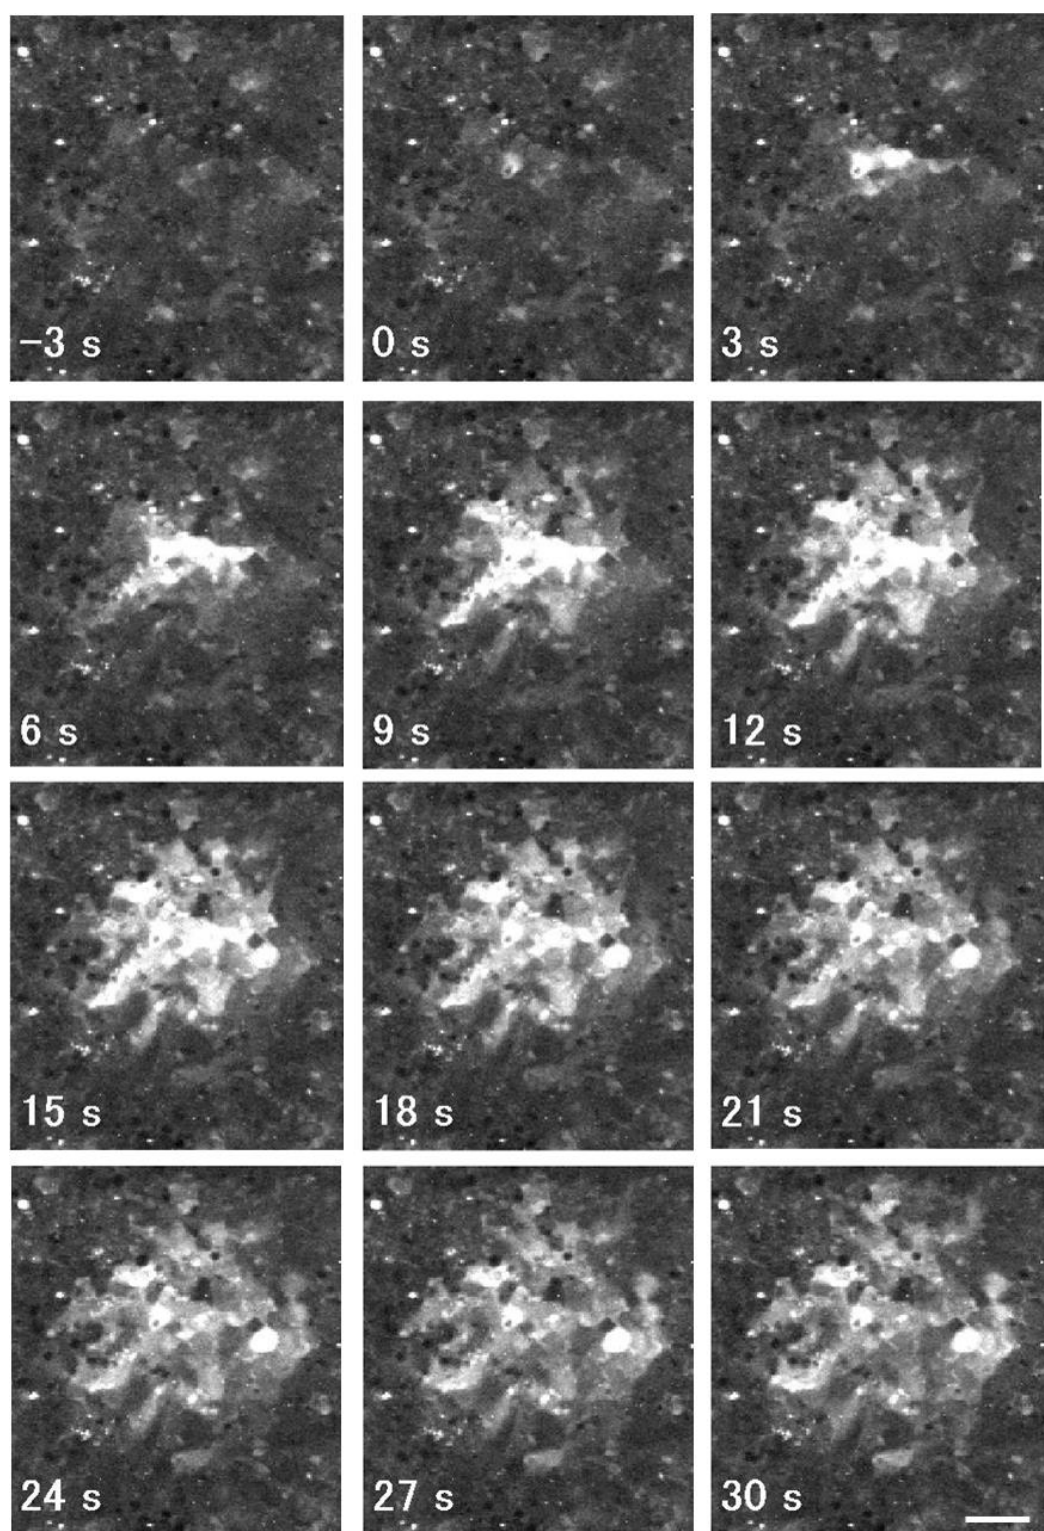

**Supplementary figure S3.** Ca wave in human iPS cells. Elevation of intracellular  $\text{Ca}^{2+}$  concentration in single cell propagated through multiple cells. Ca wave lasted for  $57 \pm 22$  s. Scale bar indicates  $50 \mu\text{m}$ .

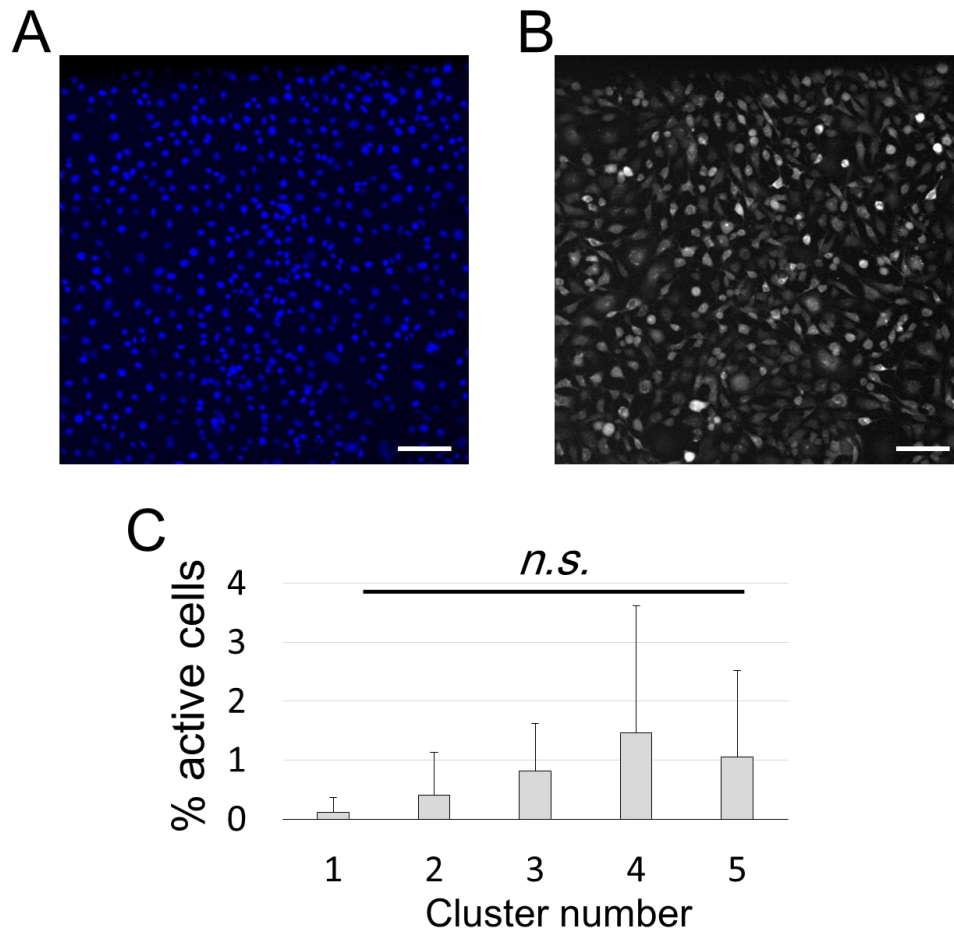

**Supplementary figure S4.** Relationship between cell cycle phase and Ca<sup>2+</sup> transients in SNL 76/7 cells. (A) Image of nuclei. (B) Representative image of Ca imaging. Scale bar indicates 100  $\mu$ m. (C) Relationship between cluster number and ratio of cells with Ca<sup>2+</sup> transients. Ca<sup>2+</sup> transients of SNL 76/7 cells were observed from only  $0.53 \pm 0.32\%$  of cells. Any relationship between cell cycle phase and Ca<sup>2+</sup> transients was observed in SNL 76/7 cells. Error bars represent SD;  $n = 5$ ; *n.s.*:  $p > 0.1$ ; Paired  $t$  test.

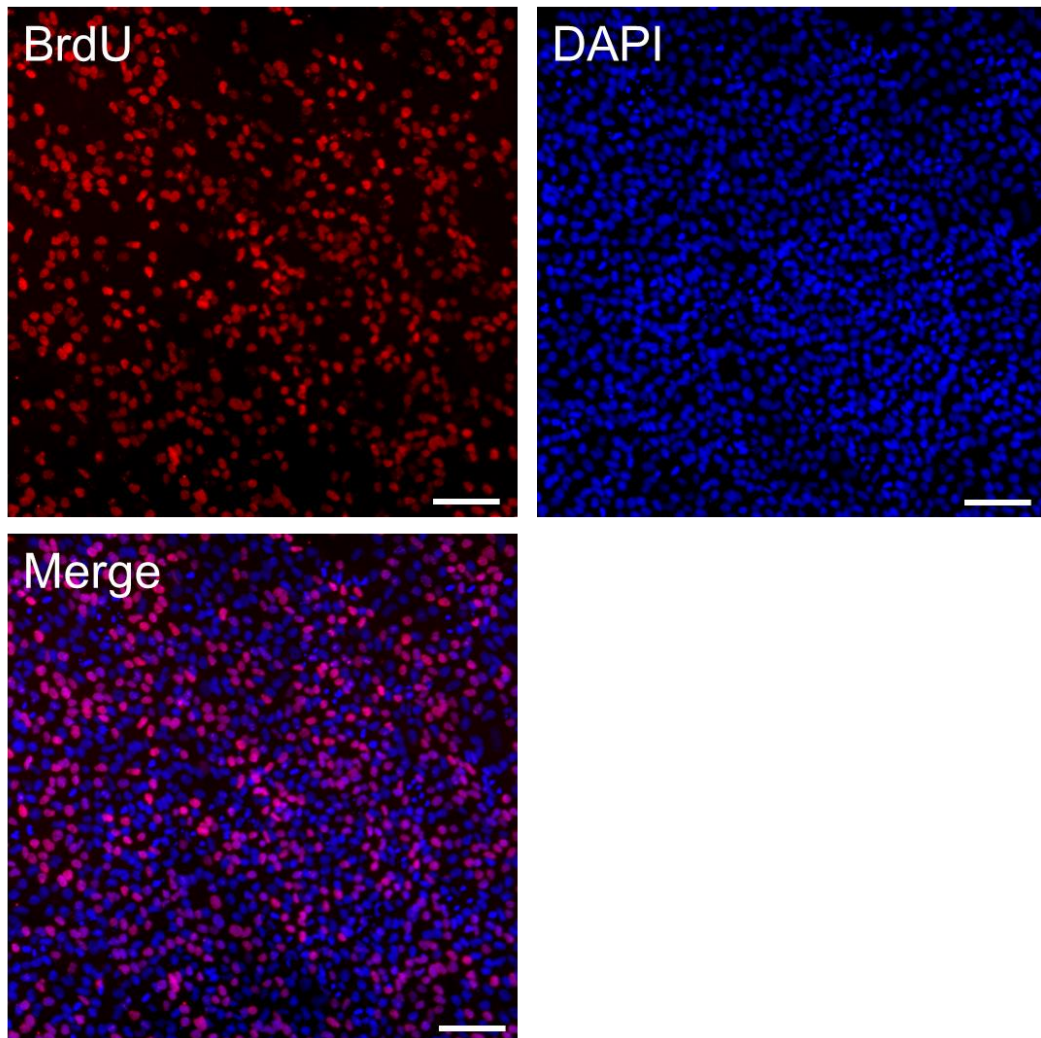

**Supplementary figure S5.** Representative images with BrdU staining. Cell cycle of human iPS cells was examined with BrdU pulse labeling assay. Cells in S phase were labeled with BrdU (red). Nuclei were stained with DAPI. Scale bars indicate 100  $\mu\text{m}$ .

**Supplementary table S1.** Parameters in the CellProfiler.

| IdentifyPrimaryObjects                      |                                            |
|---------------------------------------------|--------------------------------------------|
| Typical diameter of objects                 | 7 – 15                                     |
| Discard objects outside the diameter        | Yes                                        |
| Discard objects touching the border         | Yes                                        |
| Threshold strategy                          | Adaptive                                   |
| Thresholding method                         | Otsu                                       |
| Two-class or three class thresholding       | Two classes                                |
| The weighted variance or the entropy        | Weighted variance                          |
| Smoothing method for thresholding           | Automatic                                  |
| Threshold correction factor                 | 1 for iPS cells, 1.1 for SNL<br>76/7 cells |
| Lower and upper bounds on threshold         | 0.0 - 1.0                                  |
| Methods to calculate adaptive window size   | Custom                                     |
| Size of adaptive window                     | 20                                         |
| Method to distinguish clumped objects       | Laplacian of Gaussian                      |
| Automatically calculate the threshold       | No                                         |
| Laplacian of Gaussian threshold             | 0.2                                        |
| Automatically calculate the size of objects | No                                         |
| LoG filter diameter                         | 8                                          |
| Method to draw dividing lines               | Intensity                                  |
| Automatically calculate smoothing filter    | No                                         |
| Size of smoothing filter                    | 5                                          |
| Automatically calculate minimum distance    | No                                         |
| minimum allowed distance                    | 3                                          |
| Speed up by using lower-resolution image    | Yes                                        |
| Retain outlines of the identified objects   | Yes                                        |

| IdentifySecondaryObjects                            |              |
|-----------------------------------------------------|--------------|
| Select the method to identify the secondary objects | Distance - N |
| Number of pixels by which to expand                 | 10           |
| Fill holes in identified objects                    | Yes          |
| Discard secondary objects touching the border       | No           |
| Retain outlines of the identified objects           | Yes          |
